# Supplementary material for: High vs. Low Radiation Dose of Concurrent Chemoradiotherapy for Esophageal Carcinoma With Modern Radiotherapy Techniques: A Meta-Analysis
Source: PubMed Central journal article supplement (PMC7418493; doi:10.3389/fonc.2020.01222), 2020-08-04
Supplement: Data_Sheet_1.pdf [file Data_Sheet_1.pdf]

Supplementary Table 1. The quality of the included studies assessed by 9-star NOS

| Study                  | Selection                    |                             |                       |                        | Comparability                | Exposure                  |                                                 |                   | Scores |
|------------------------|------------------------------|-----------------------------|-----------------------|------------------------|------------------------------|---------------------------|-------------------------------------------------|-------------------|--------|
|                        | Adequate definition of cases | Representativeness of cases | Selection of controls | Definition of controls | Control for important factor | Ascertainment of exposure | Same method to ascertain for cases and controls | Non-response rate |        |
| Clavier et al,2013(15) | ☆                            | ☆                           | ☆                     | ☆                      | ☆                            | ☆                         | ☆                                               | -                 | 7      |
| He et al, 2014(16)     | ☆                            | ☆                           | ☆                     | ☆                      | ☆                            | ☆                         | ☆                                               | -                 | 7      |
| Brower et al, 2016(17) | ☆                            | ☆                           | ☆                     | ☆                      | ☆                            | ☆                         | ☆                                               | -                 | 7      |
| Chen et al, 2016(18)   | ☆                            | ☆                           | ☆                     | ☆                      | ☆☆                           | ☆                         | ☆                                               | -                 | 8      |
| Chang et al, 2017(19)  | ☆                            | ☆                           | ☆                     | ☆                      | ☆                            | ☆                         | ☆                                               | -                 | 7      |
| Kim et al, 2017(20)    | ☆                            | ☆                           | ☆                     | ☆                      | ☆                            | ☆                         | ☆                                               | -                 | 7      |
| Deng et al, 2017(21)   | ☆                            | ☆                           | ☆                     | ☆                      | ☆                            | ☆                         | ☆                                               | -                 | 7      |
| Zhang et al, 2018(22)  | ☆                            | ☆                           | ☆                     | ☆                      | ☆                            | ☆                         | ☆                                               | -                 | 7      |
| Ren et al,2018(23)     | ☆                            | ☆                           | ☆                     | ☆                      | ☆☆                           | ☆                         | ☆                                               | -                 | 8      |
| Ke et al, 2018(24)     | ☆                            | ☆                           | ☆                     | ☆                      | ☆                            | ☆                         | ☆                                               | -                 | 7      |
| Li C et al, 2019(25)   | ☆                            | -                           | ☆                     | ☆                      | ☆                            | ☆                         | ☆                                               | -                 | 6      |

NOS: Newcastle-Ottawa Scale.

Supplementary Table 2. The quality of the included studies assessed by modified Jadad Score

| Studies (Year)      | Randomization | Concealment of allocation | Double blinding | Withdrawals and dropouts | Score |
|---------------------|---------------|---------------------------|-----------------|--------------------------|-------|
| Zhu et al, 2012(14) | 1             | 2                         | 2               | 0                        | 5     |
